# Supplementary material
Source: publisher site journal article supplement (https://www.degruyterbrill.com/publication/journal_key/HTMP/downloadAsset/HTMP_CFP_Special%20Issue%20for%20the%20conference%20AMEM2025.pdf)
Supplement: Supplementary file 1 [file HTMP_CFP_Special%20Issue%20for%20the%20conference%20AMEM2025.pdf]

Topical Issue in High Temperature Materials and Processes:

## AMEM 2025 4TH INTERNATIONAL CONFERENCE ON ADVANCED MATERIALS AND EQUIPMENT MANUFACTURING

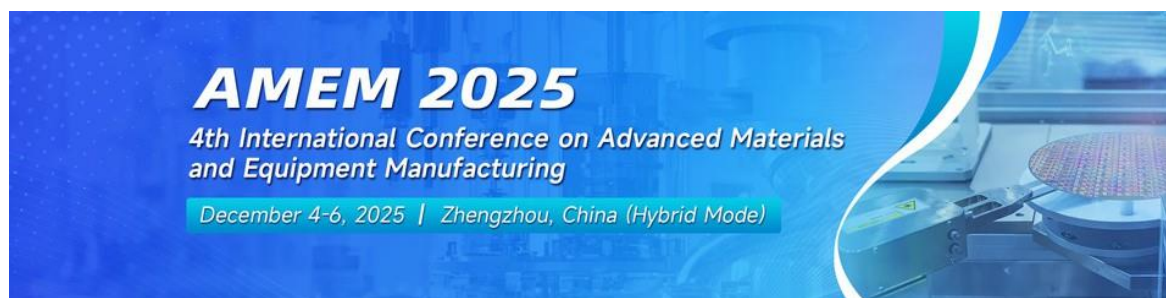

### GUEST EDITORS

---

**Prof. Dr. Qasim Zeeshan**

Eastern Mediterranean University, Turkey;  
[qasim.zeeshan@emu.edu.tr](mailto:qasim.zeeshan@emu.edu.tr)

**Prof. Dr. Meichun Li**

China University of Petroleum (East China), China;  
[mli@upc.edu.cn](mailto:mli@upc.edu.cn)

**Prof. Dr. Paulo Cesar de Moraes**

Catholic University of Brasilia, Brazil;  
[pcmor@unb.br](mailto:pcmor@unb.br)

Welcome to the 4th International Conference on Advanced Materials and Equipment Manufacturing (AMEM 2025), which is an important platform that brings both industry and academia for the dissemination of technological advances, research results and applications in the fields of Advanced Materials and Equipment Manufacturing. We warmly invite researchers and scholars around the world to attend the conference to present and discuss recent innovations, trends, challenges, and solutions in this field, while gaining inspiration for groundbreaking advancements. AMEM 2025 will be held during:

December 4-6, 2025 in Zhengzhou, China.

Link to conference: [AMEM 2025](#)

## TOPIC AND SCOPE

---

AMEM 2025 is a technical congregation where the latest theoretical and technological advances are presented and discussed. We sincerely welcome authors to submit their research to AMEM 2025.

Contributions are sought in the following areas:

### 1) Advanced Materials

Non-ferrous metal materials

Composite materials

Micro/Nano materials for photonic devices and sensors

Optical/Electronic/Magnetic materials

New optical and optoelectronic functional materials

New building materials

New energy materials

Environmentally friendly materials

Photonic biomaterials

Polymer materials

Smart materials

Renewable materials

Materials science and engineering

Advanced materials processing

### 2) Equipment Manufacturing

Engine manufacturing

Green manufacturing

Embedded systems

Laser processing

Powder metallurgy

Power and fluid machinery

Intelligent control technology

Surface engineering/Coating technology

Advanced NC techniques and equipment

Microelectronic and photonic packaging technology

Measurement and control technology in photonics manufacturing

Ultra-precision optical manufacturing and equipment

Marine and offshore engineering

Aviation equipment manufacturing

Automobile manufacturing

Advanced manufacturing production mode

## HOW TO SUBMIT

---

Deadline: March 15, 2026

Estimated number of manuscripts: 30-35 papers

Before submission authors should carefully read the Instruction for Authors. In order to make the preparation of manuscript easier, you are advised to use the Manuscript Template. All submissions to the Topical Issue must be made electronically via the Editorial Manager submission and tracking review system. When entering your submission via online submission system please choose “The 5th International Conference on Advanced Materials and Intelligent Manufacturing”. All manuscripts will undergo the standard peer-review process (single-blind, at least two independent reviewers). The deadline for submissions is March 15, 2026, but individual papers will be reviewed and published online on an ongoing basis.

In case of any question please contact Ms. Joanna Kosińska, Managing Editor of High Temperature Materials and Processes, [Joanna.Kosinska@degruyter.com](mailto:Joanna.Kosinska@degruyter.com)
